# Supplementary material for: Regulation of stem cell self-renewal and differentiation by Wnt and Notch are conserved throughout the adenoma-carcinoma sequence in the colon
Source: PubMed Central journal article supplement (PMC4016508; doi:10.1186/1476-4598-12-126), 2013-10-21

**Supplementary figure 1.** Multipotential differentiation from various CRC stages

**A**

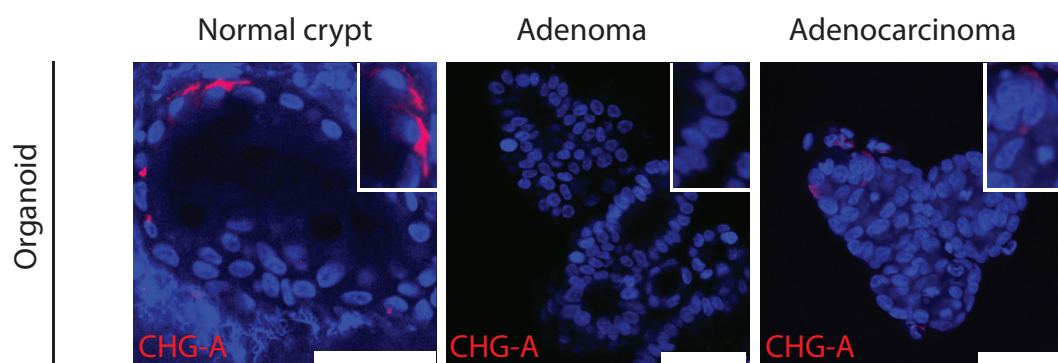

**B**

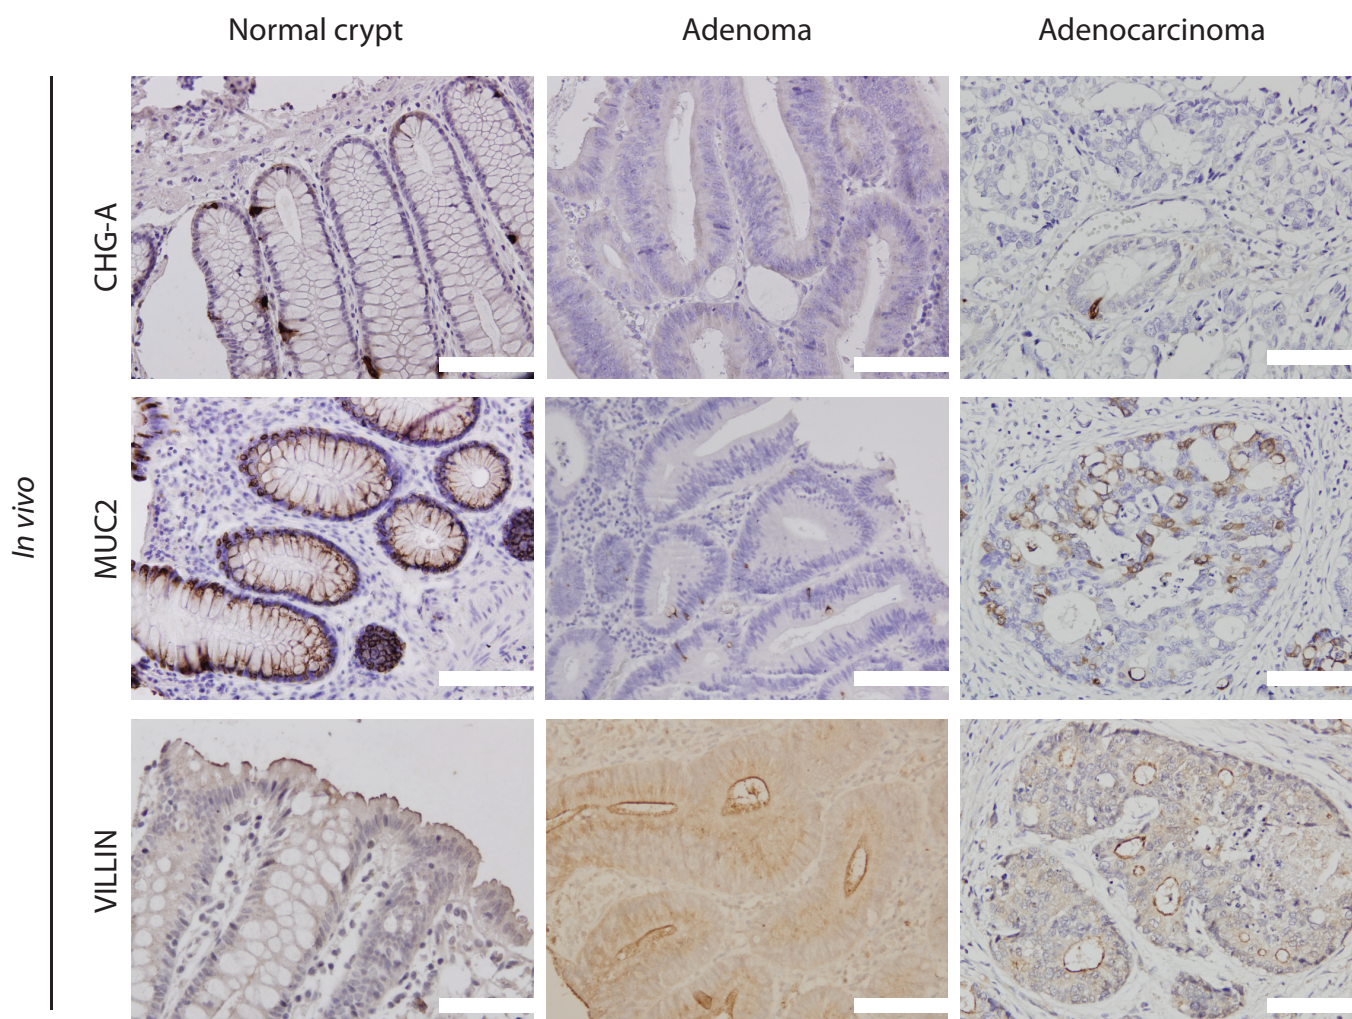

Supplement: 1476-4598-12-126-S2.pdf [file 1476-4598-12-126-S2.pdf]
